# Supplementary material for: Simulation of the Nearshore Sediment Transport Pattern and Beach Morphodynamics in the Semi-Enclosed Bay of Myrtos, Cephalonia Island, Ionian Sea
Source: MDPI journal article supplement (doi:10.3390/jmse10081015), 2022-07-25
Supplement: s1 [file s1]

Archive with 1 entries (1 files):
- jmse-1689952-supplementary.pdf
