# Supplementary material for: Simulation of the Nearshore Sediment Transport Pattern and Beach Morphodynamics in the Semi-Enclosed Bay of Myrtos, Cephalonia Island, Ionian Sea
Source: MDPI journal article supplement (doi:10.3390/jmse10081015), 2022-07-25
Supplement: s1 [file s1 › jmse-1689952-supplementary.pdf]

## Supplementary

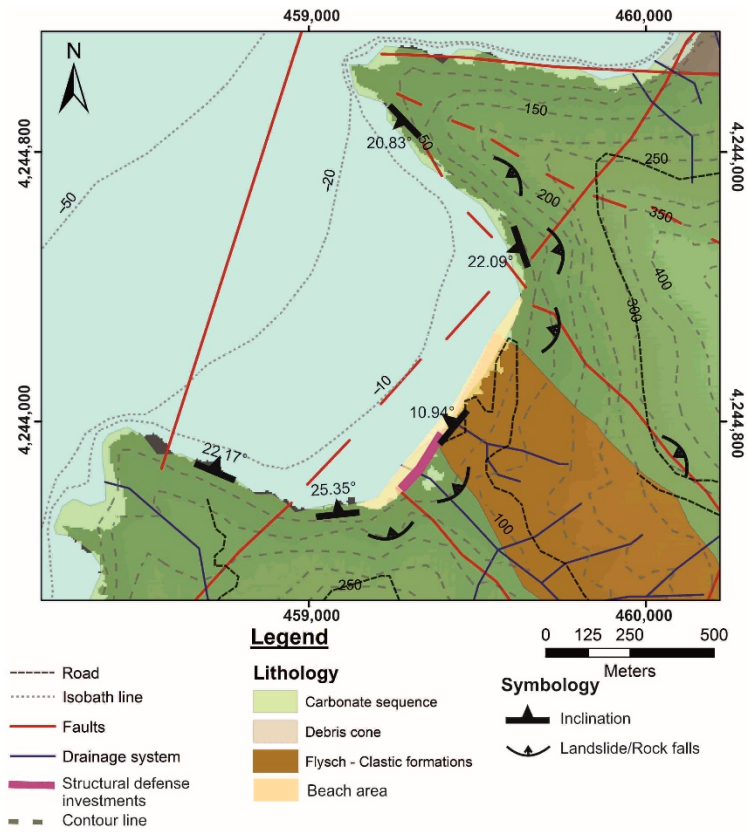

**Figure S1.** Lithological and geomorphological map of the study area. Geology based on geological map of Greece (1:50,000), Cephalonia Island (northern part), Institute of Geology and Mineral Exploration.

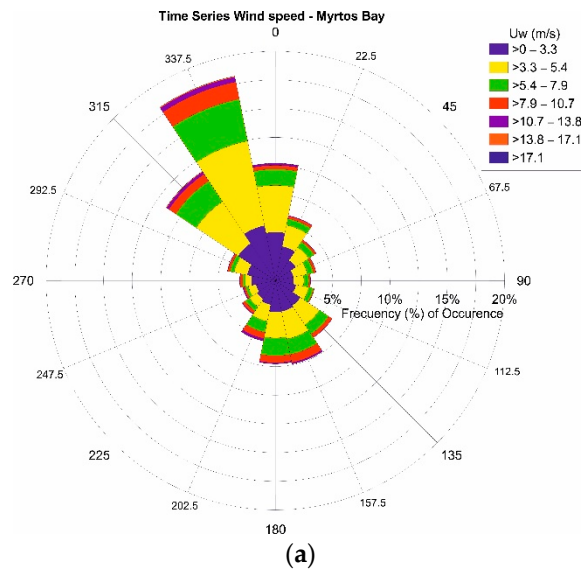

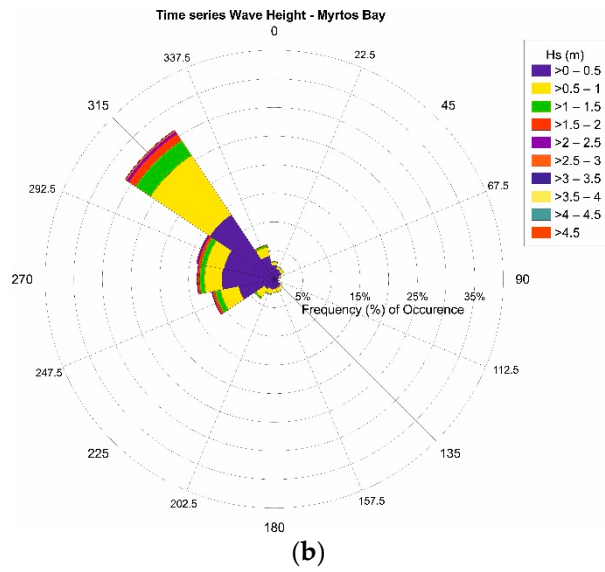

**Figure S2.** (a) Wind and (b) wave rose diagram for the study area from 1995 to 2004.

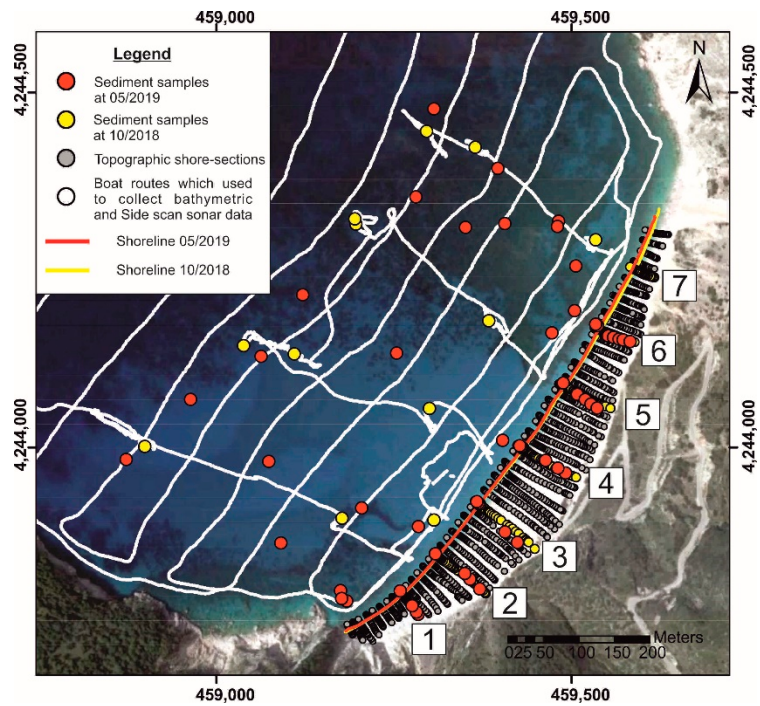

**Figure S3.** Field survey that was carried out during 10/2018 and 05/2019.

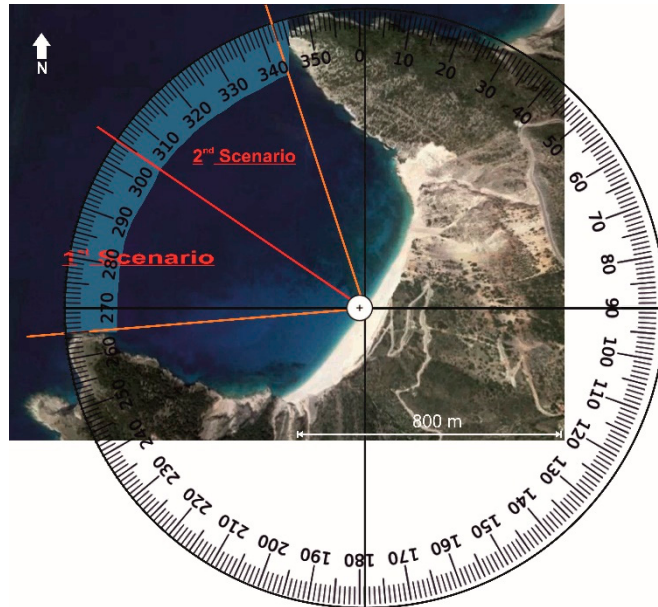

**Figure S4.** The direction of Myrtos Bay ranges between 265° and 343°, whereas the orientation of the coastline is 304°; the two representative scenarios that contribute to the sediment transport from one side to the other and in the opposite direction are scenario 1: 264–304° and scenario 2: 305–343°.
